# Supplementary material for: Injectable self-healing hydrogels formed via thiol/disulfide exchange of thiol functionalized F127 and dithiolane modified PEG
Source: Royal Society of Chemistry journal article supplement (doi:10.1039/c7tb00746a), 2017-01-01
Supplement: c7tb00746a1.pdf [file c7tb00746a1.pdf]

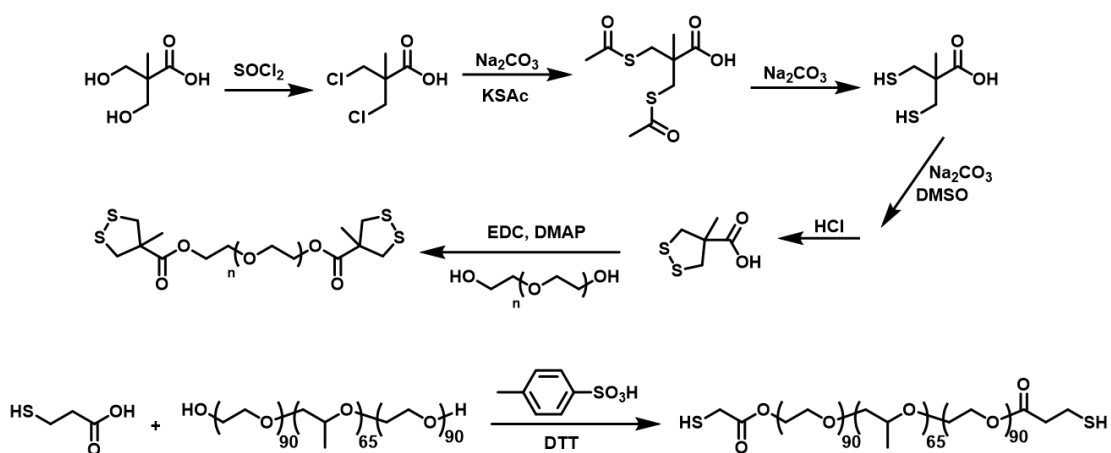

Figure S1 Schematic synthetic procedures of the functionalized F127 and PEG

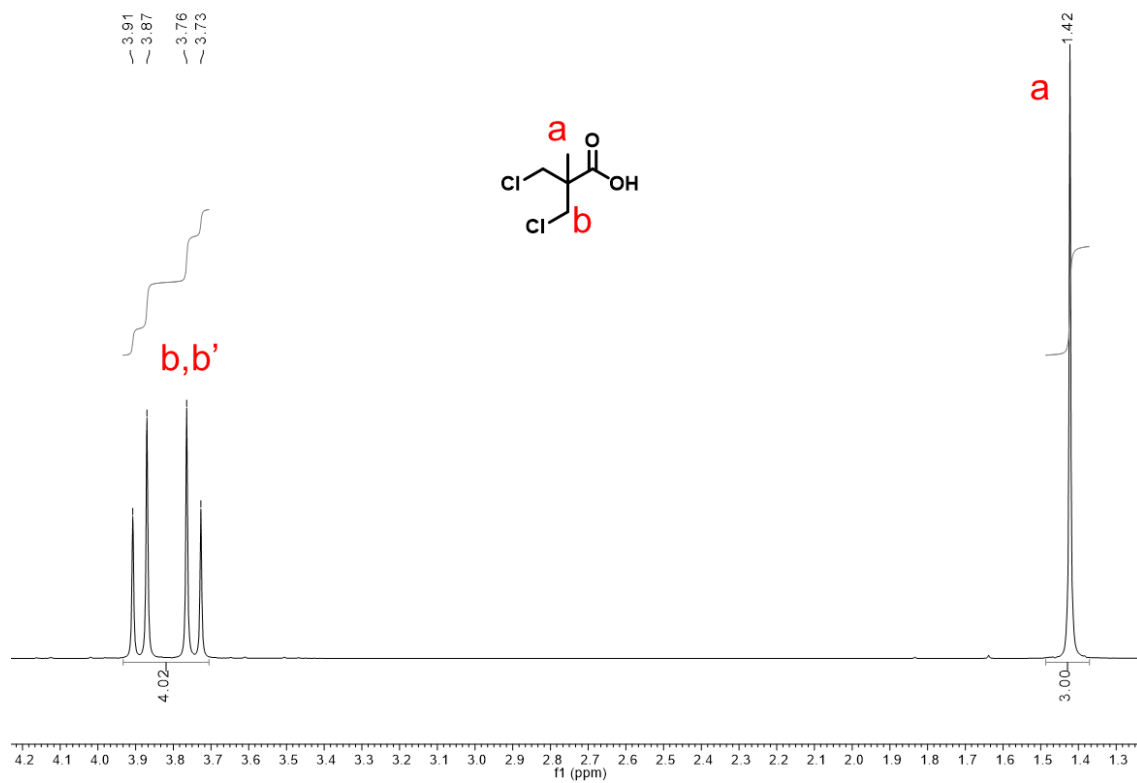

Figure S2 <sup>1</sup>H-NMR of 2,2-bis(chloromethyl)propionic acid (DCMPA)

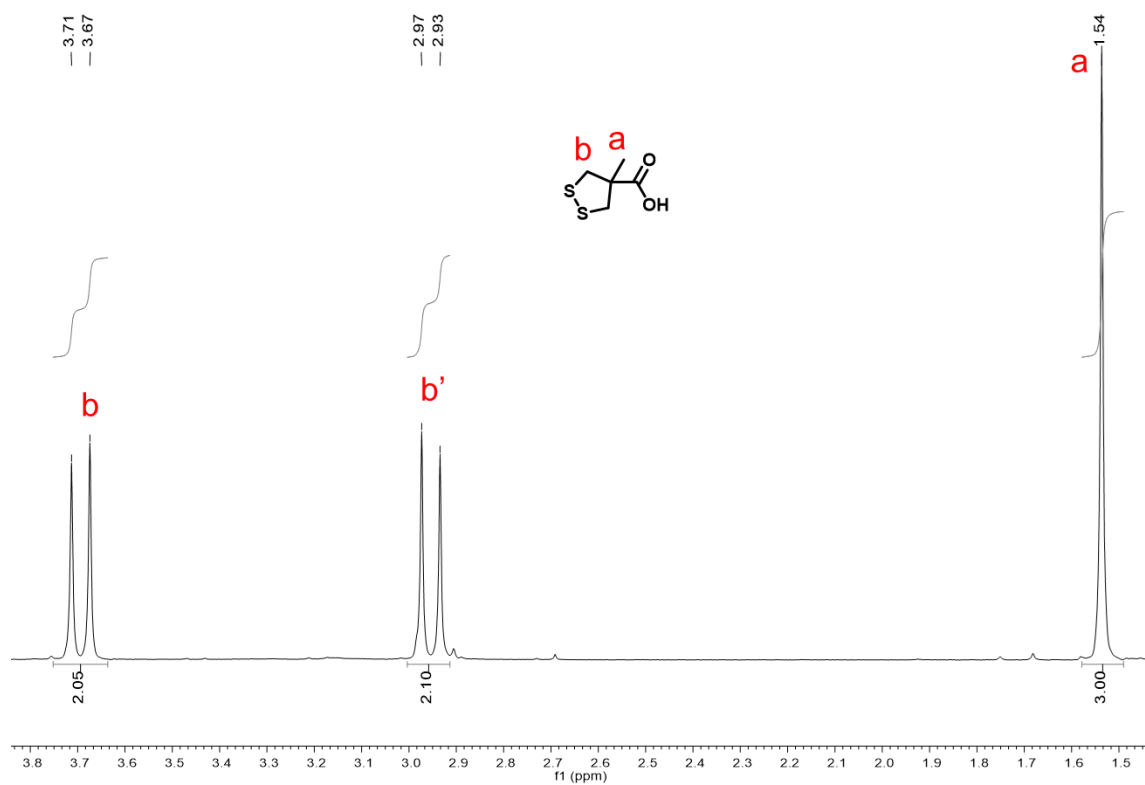

Figure S3  $^1\text{H-NMR}$  of 4-methyl-1,2-dithiolane-4-carboxylic acid(MDTCA)

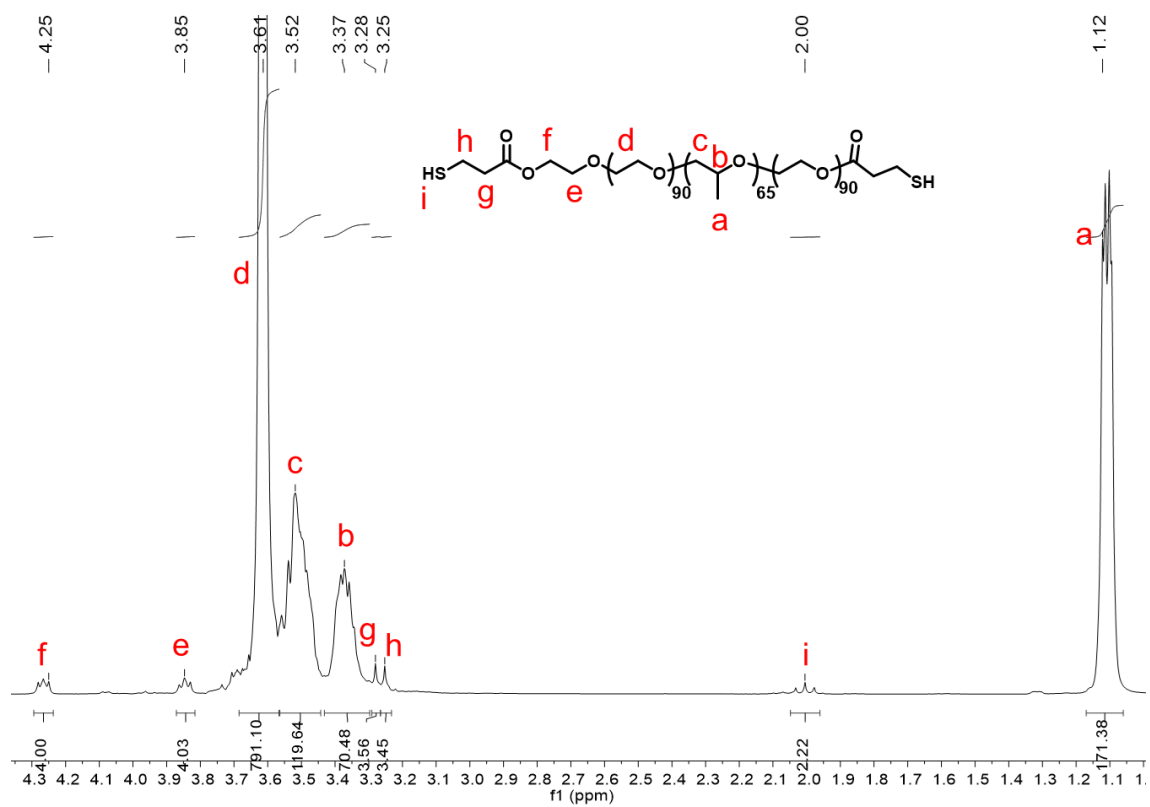

Figure S4 <sup>1</sup>H-NMR of thiol functionalized F127 (HS-F127-SH)

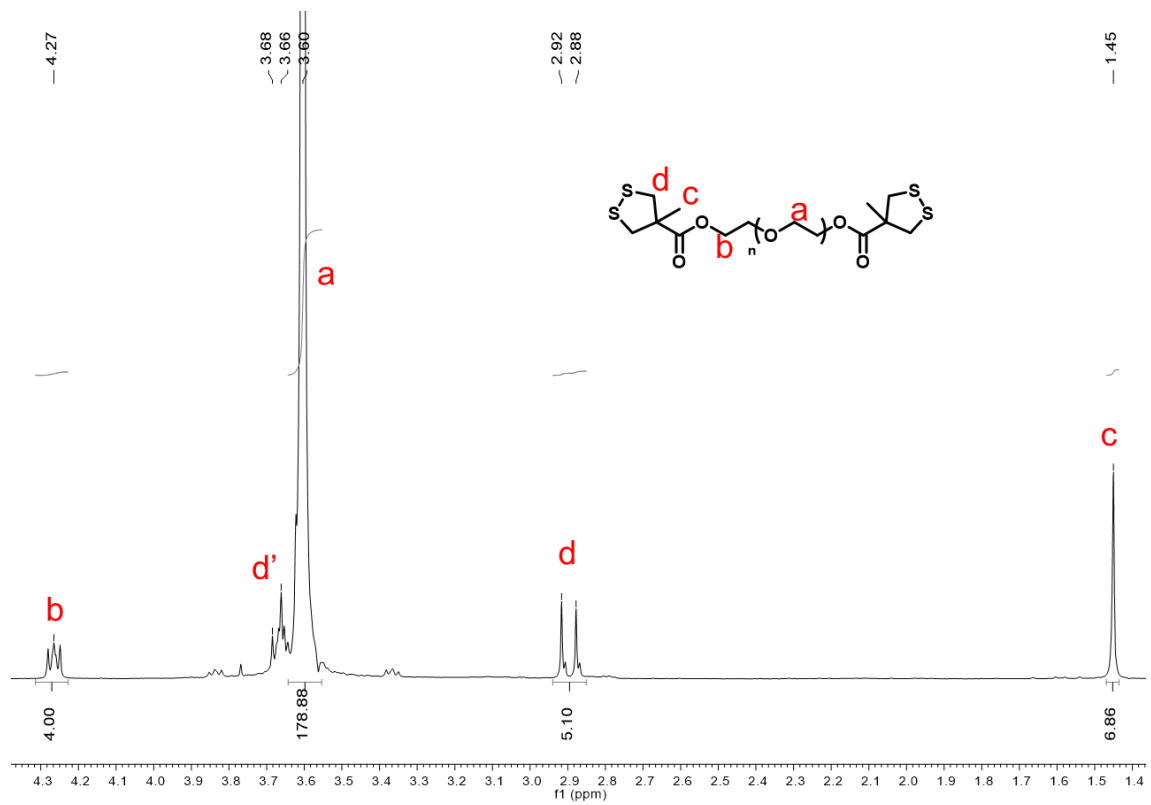

Figure S5 <sup>1</sup>H-NMR of 1,2-dithiolane functionalized PEG (DT-PEG-DT)

| Ratio<br>(Thiol/DT) | HS-F127-SH | DT-PEG-DT | PBS    | wt%   |
|---------------------|------------|-----------|--------|-------|
| 4/1                 | 1.5g       | 0.07g     | 8.90g  | 15wt% |
| 2/1                 | 1.5g       | 0.14g     | 9.28g  | 15wt% |
| 1/1                 | 1.5g       | 0.28g     | 10.06g | 15wt% |
| 1/2                 | 1.5g       | 0.55g     | 11.63g | 15wt% |

**Table S1** components of the gels of different mole ratio of thiol/dithiolane

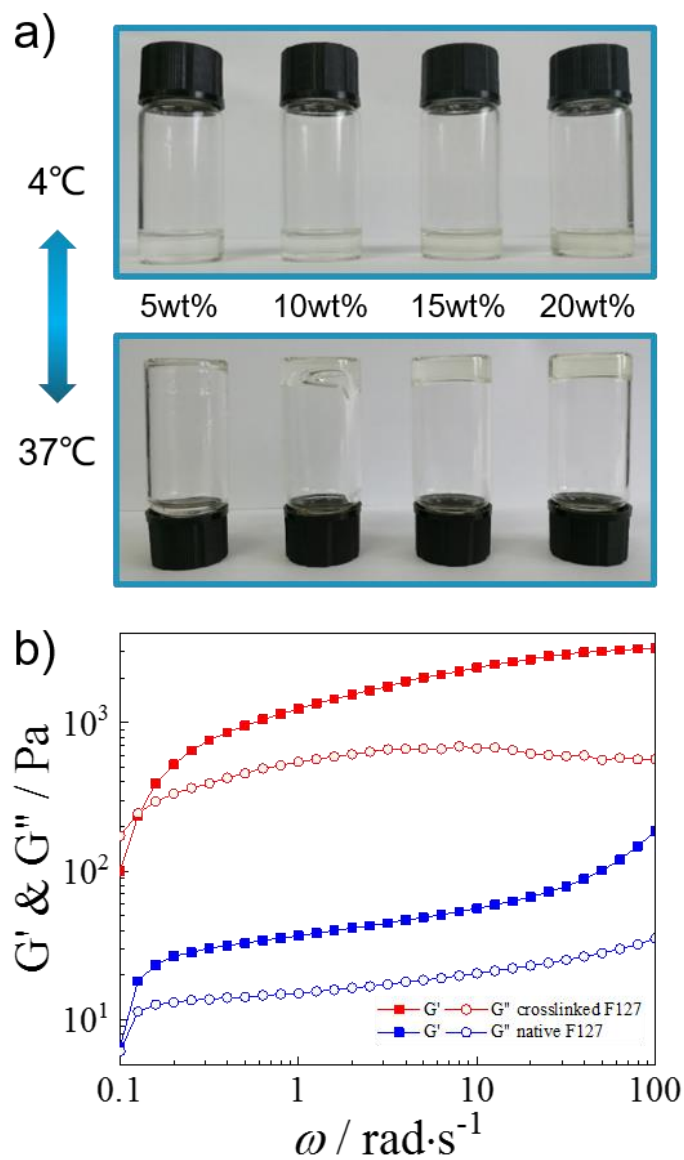

**Figure S6** a) Sol-gel transition of the hydrogels of different solid content at body temperature. b) Rheological properties of the crosslinked hydrogel and the hydrogel delivered from native F127 polymer (15 wt%).

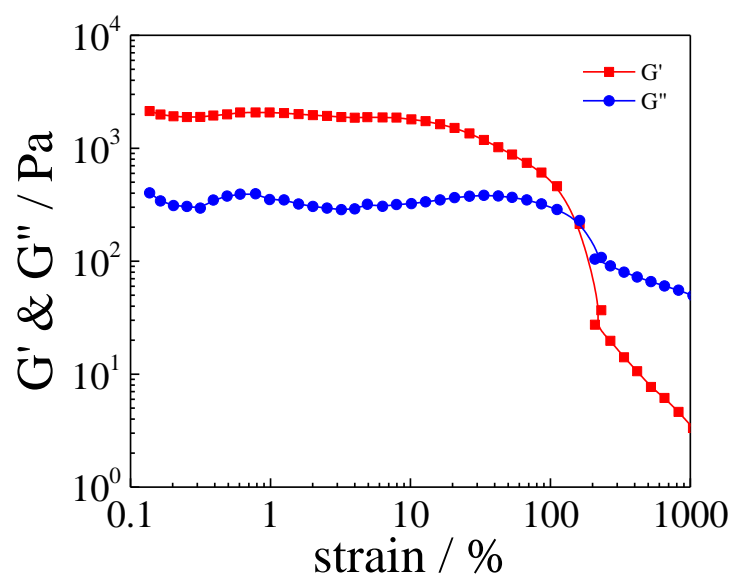

Figure S7 Strain sweep measurements of a 15wt% hydrogel treated with excess amount of maleimide at 37°C



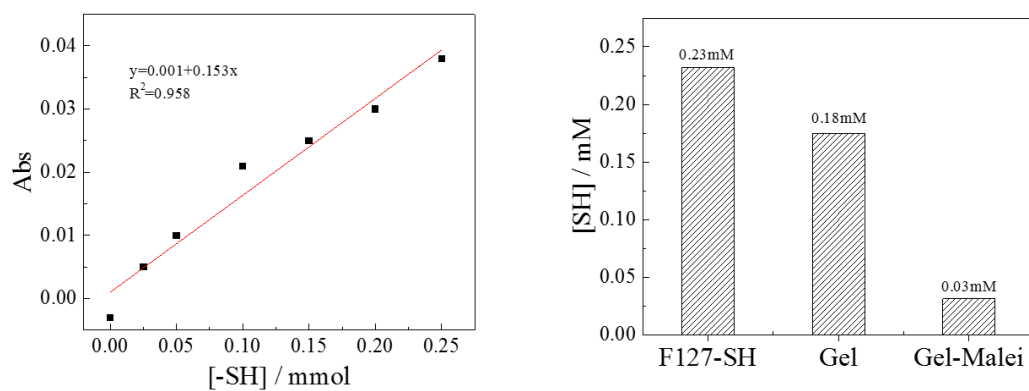

**Figure S8** a) Calibration curve of thiol concentration using N-Acetyl cysteine as reference for the quantification of thiol groups, b) summary of the amount of free thiol in different polymer solution.

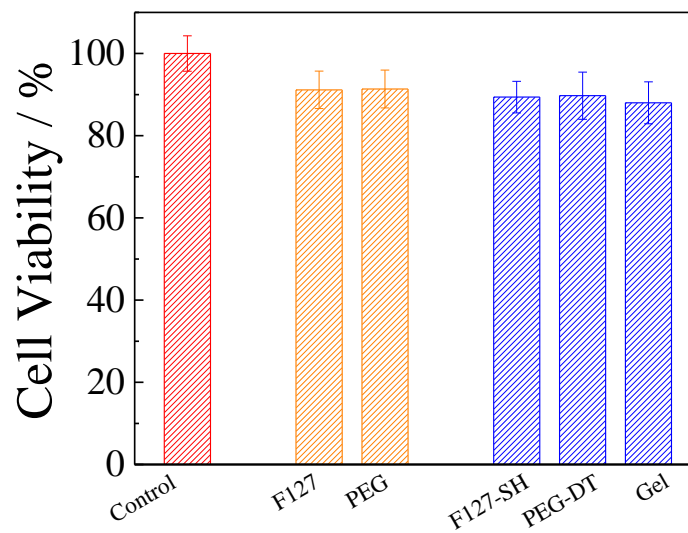

**Figure S9** In vitro cytotoxicity evaluation of original F127, original PEG, SH-F127-SH, DT-PEG-DT and diluted gel solution.
